# Supplementary material for: Homo- and heterometallic coordination networks based on linear trinuclear Co(ii) units: syntheses, structures and magnetic properties
Source: Royal Society of Chemistry journal article supplement (doi:10.1039/c5ra00728c), 2015-01-01

## Supplementary Information

### **Homo- and heterometallic coordination networks based on linear trinuclear Co(II) units: synthesis, structures and magnetic properties**

Wun-Jih Huang,<sup>a</sup> Chia-Ju Hsu,<sup>a</sup> Shao-Kang Tsai,<sup>a</sup> Hsiu-Yi He,<sup>a</sup>  
Jaw-Jih Ding,<sup>b</sup> Ting-Wei Hsu,<sup>b</sup> Chun-Chuen Yang,<sup>b\*</sup> and Jhy-Der Chen<sup>a\*</sup>

<sup>a</sup>*Department of Chemistry, Chung-Yuan Christian University, Chung-Li,  
Taiwan, R.O.C.*

<sup>b</sup>*Department of Physics, Chung-Yuan Christian University, Chung-Li,  
Taiwan, R.O.C.*

**Table S1.** Selected bond distances (Å) and angles (°) for **1**.

| distances   |            |             |            |
|-------------|------------|-------------|------------|
| Co(1)-O(6)  | 1.968(2)   | Co(1)-O(2)  | 1.980(2)   |
| Co(1)-N(1)  | 2.067(3)   | Co(1)-O(4A) | 2.134(2)   |
| Co(1)-O(5A) | 2.1808(18) | Co(2)-O(7)  | 2.035(2)   |
| Co(2)-O(7B) | 2.035(2)   | Co(2)-O(3)  | 2.0519(18) |
| Co(2)-O(3B) | 2.0520(18) | Co(2)-O(5C) | 2.1301(19) |
| Co(2)-O(5A) | 2.1301(19) |             |            |

  

| angles            |            |                   |            |
|-------------------|------------|-------------------|------------|
| O(6)-Co(1)-O(2)   | 115.06(11) | O(6)-Co(1)-N(1)   | 95.82(10)  |
| O(2)-Co(1)-N(1)   | 93.14(10)  | O(6)-Co(1)-O(4A)  | 143.49(11) |
| O(2)-Co(1)-O(4A)  | 96.02(12)  | N(1)-Co(1)-O(4A)  | 101.34(10) |
| O(6)-Co(1)-O(5A)  | 95.20(9)   | O(2)-Co(1)-O(5A)  | 98.86(8)   |
| N(1)-Co(1)-O(5A)  | 158.46(9)  | O(4A)-Co(1)-O(5A) | 59.80(8)   |
| O(7)-Co(2)-O(7B)  | 179.999(1) | O(7)-Co(2)-O(3)   | 94.31(9)   |
| O(7B)-Co(2)-O(3)  | 85.69(9)   | O(7)-Co(2)-O(3B)  | 85.69(9)   |
| O(7B)-Co(2)-O(3B) | 94.31(9)   | O(3)-Co(2)-O(3B)  | 180.00(10) |
| O(7)-Co(2)-O(5A)  | 90.17(8)   | O(7B)-Co(2)-O(5A) | 89.83(8)   |
| O(3)-Co(2)-O(5A)  | 92.41(8)   | O(3B)-Co(2)-O(5A) | 87.59(8)   |

Symmetry transformations used to generate equivalent atoms:

(A)  $x, -y + 2, z + 1/2$       (B)  $-x + 3/2, -y + 3/2, -z - 1$

**Table S2.** Selected bond distances (Å) and angles (°) for **2**.

|                   |            |                   |            |
|-------------------|------------|-------------------|------------|
| Co(1)-O(9A)       | 1.940(2)   | K-O(5C)           | 2.860(3)   |
| Co(1)-O(1)        | 2.006(2)   | K-O(2)            | 2.585(3)   |
| Co(1)-O(3B)       | 1.992(3)   | K-O(7)            | 2.705(3)   |
| Co(1)-O(6)        | 1.962(2)   | K-O(7G)           | 2.790(2)   |
| Co(2)-O(1E)       | 2.270(2)   | K-O(5)            | 2.859(3)   |
| Co(2)-O(8D)       | 2.086(2)   | K-O(10F)          | 2.755(4)   |
| Co(2)-O(4B)       | 1.988(2)   | K-O(9A)           | 3.006(3)   |
| O(9A)-Co(1)-O(6)  | 110.83(10) | O(3B)-Co(1)-O(1)  | 104.33(10) |
| O(9A)-Co(1)-O(3B) | 108.04(12) | O(9A)-Co(1)-K     | 52.71(8)   |
| O(6)-Co(1)-O(3B)  | 100.17(10) | O(6)-Co(1)-K      | 77.28(7)   |
| O(9A)-Co(1)-O(1)  | 113.17(10) | O(3B)-Co(1)-K     | 155.62(8)  |
| O(6)-Co(1)-O(1)   | 118.69(10) | O(1)-Co(1)-K      | 97.89(7)   |
| O(4B)-Co(2)-O(4C) | 180.00(5)  | O(4B)-Co(2)-O(8D) | 87.71(11)  |
| O(4C)-Co(2)-O(8D) | 92.29(11)  | O(4B)-Co(2)-O(8A) | 92.29(11)  |
| O(4C)-Co(2)-O(8A) | 87.71(11)  | O(8D)-Co(2)-O(8A) | 180.0(2)   |
| O(4B)-Co(2)-O(1E) | 90.22(9)   | O(4C)-Co(2)-O(1E) | 89.78(9)   |
| O(8D)-Co(2)-O(1E) | 94.80(8)   | O(8A)-Co(2)-O(1E) | 85.20(8)   |
| O(4B)-Co(2)-O(1)  | 89.78(9)   | O(4C)-Co(2)-O(1)  | 90.22(9)   |
| O(8D)-Co(2)-O(1)  | 85.20(8)   | O(8A)-Co(2)-O(1)  | 94.80(8)   |
| O(1E)-Co(2)-O(1)  | 180.0      | O(2)-K-O(7)       | 91.82(9)   |
| O(2)-K-O(10F)     | 85.38(10)  | O(7)-K-O(10F)     | 74.83(11)  |
| O(2)-K-O(7G)      | 171.40(10) | O(7)-K-O(7G)      | 94.41(7)   |
| O(10F)-K-O(7G)    | 90.52(9)   | O(2)-K-O(5C)      | 76.67(9)   |

|               |           |                |            |
|---------------|-----------|----------------|------------|
| O(7)-K-O(5C)  | 165.55(9) | O(10F)-K-O(5C) | 112.27(11) |
| O(7G)-K-O(5C) | 98.01(8)  | O(2)-K-O(9A)   | 64.98(8)   |
| O(7)-K-O(9A)  | 68.34(8)  | O(10F)-K-O(9A) | 130.86(11) |
| O(7G)-K-O(9A) | 122.98(8) | O(5C)-K-O(9A)  | 98.50(8)   |

---

Symmetry transformations used to generate equivalent atoms:

(A)  $x, y - 1, z$ ; (B)  $x, -y + 1, z + 1/2$ ; (C)  $-x + 1/2, y - 1/2, -z - 1/2$ ; (D)  $-x + 1/2, -y + 3/2, -z$ ; (E)  $-x + 1/2, -y + 1/2, -z$ ; (F)  $-x + 1, -y + 2, -z$ ; (G)  $-x + 1, -y + 1, -z$ .

**Fig. S1.** TGA curve of **1**.

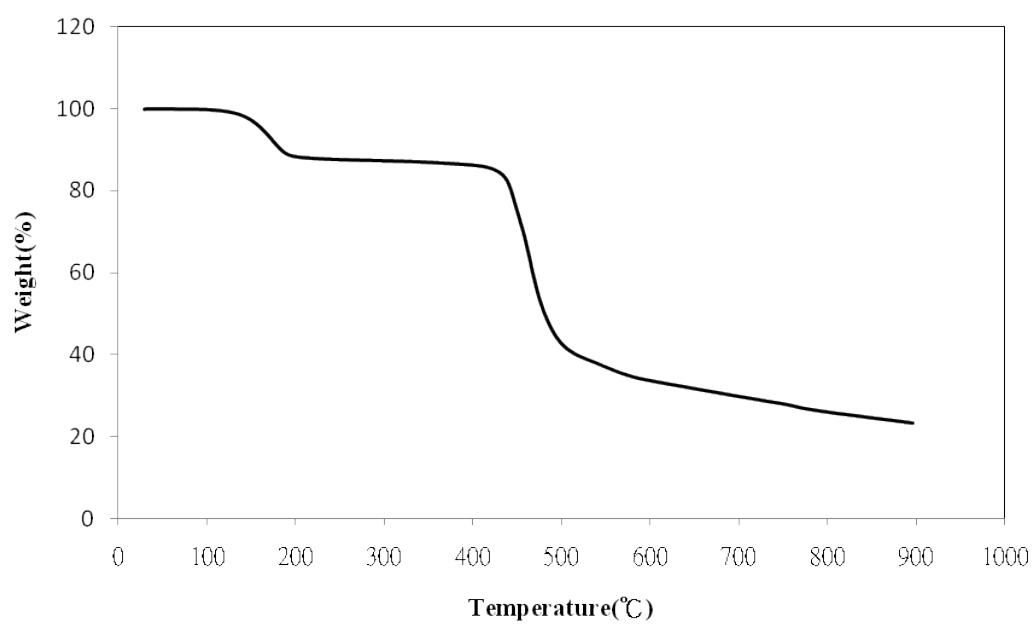

**Fig. S2.** TGA curve of **2**.

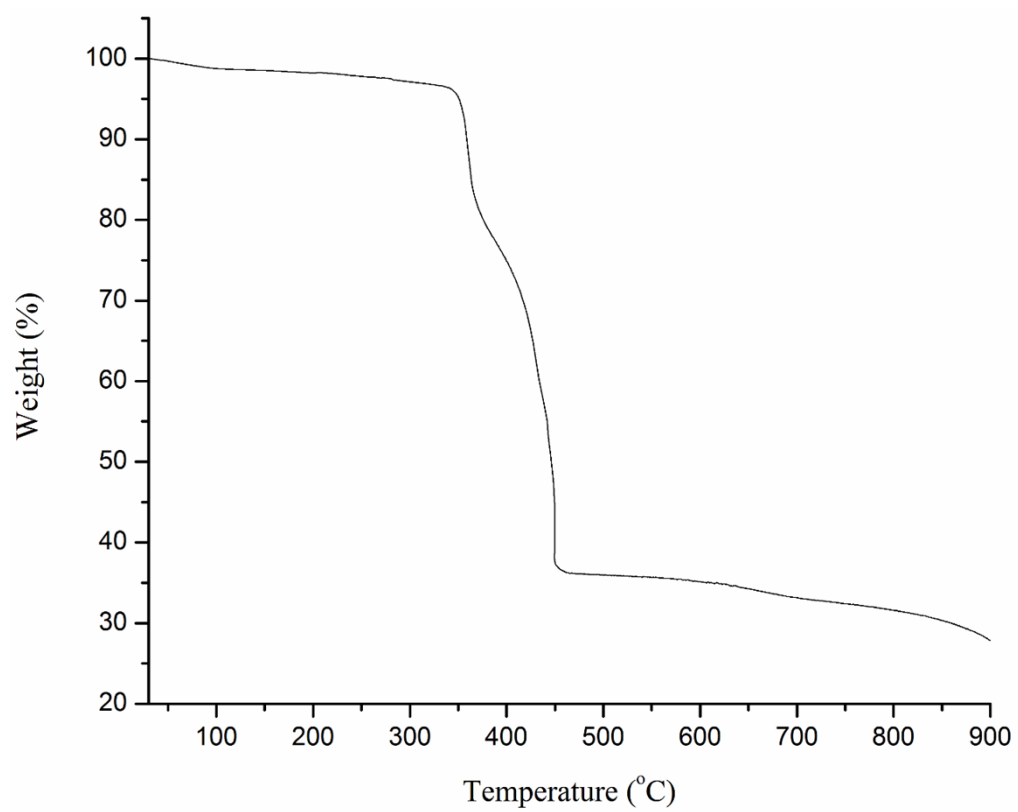

**Fig. S3.** Refinement results of powder X-ray diffraction patterns of **1**, showing observed (red crosses) and calculated (green solid line) spectra and their difference (purple line), with estimated peak positions (black dash).

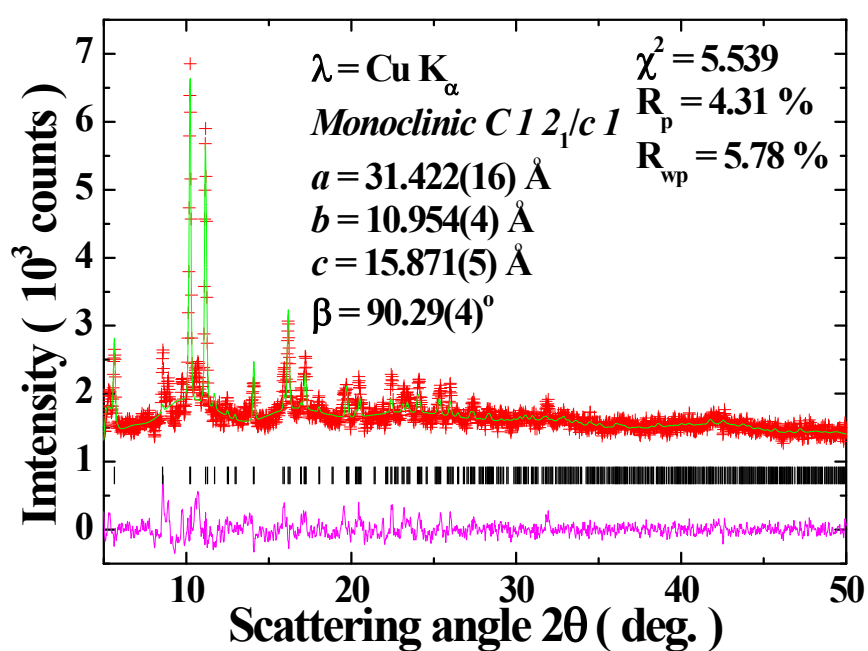

**Fig. S4.** Refinement results of powder X-ray diffraction patterns of **2**, showing observed (red crosses) and calculated (green solid line) spectra and their difference (purple line), with estimated peak positions (black dash).

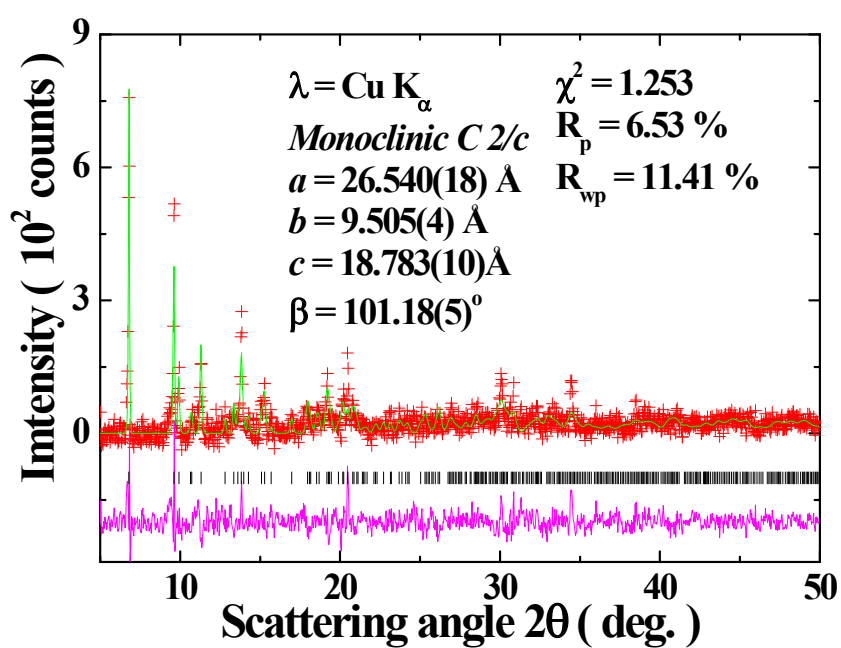

Supplement: c5ra00728c1.pdf [file c5ra00728c1.pdf]
